# Supplementary material
Source: MDPI journal article supplement (https://www.mdpi.com/1996-1073/10/7/961)
Supplement: s1 [file s1]

# Supplementary Materials: On the response of nascent soot nanostructure and oxidative reactivity to photoflash exposure

Wei Wang, Dong Liu, Yaoyao Ying, Guannan Liu and Ye Wu

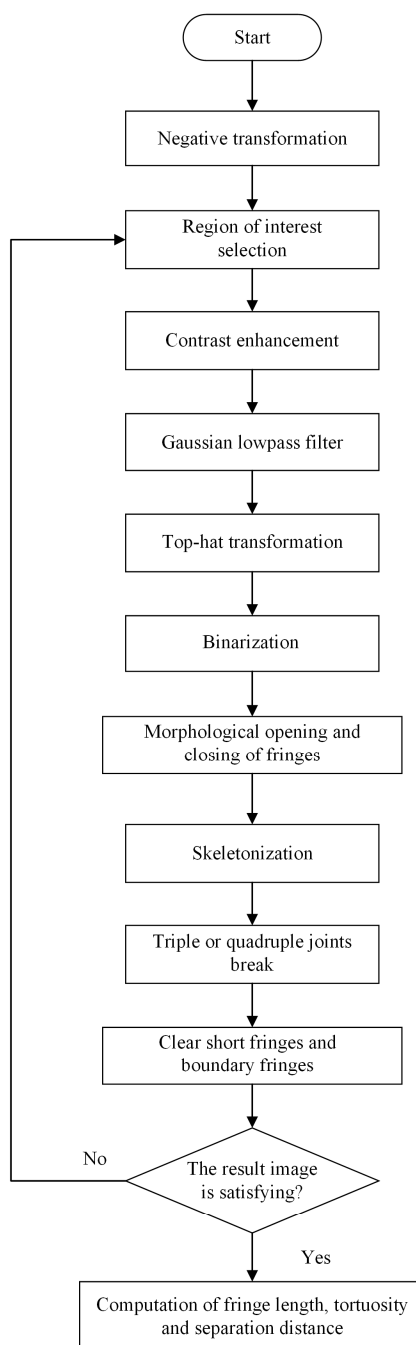

Figure S1. Flow chart of HRTEM image processing.

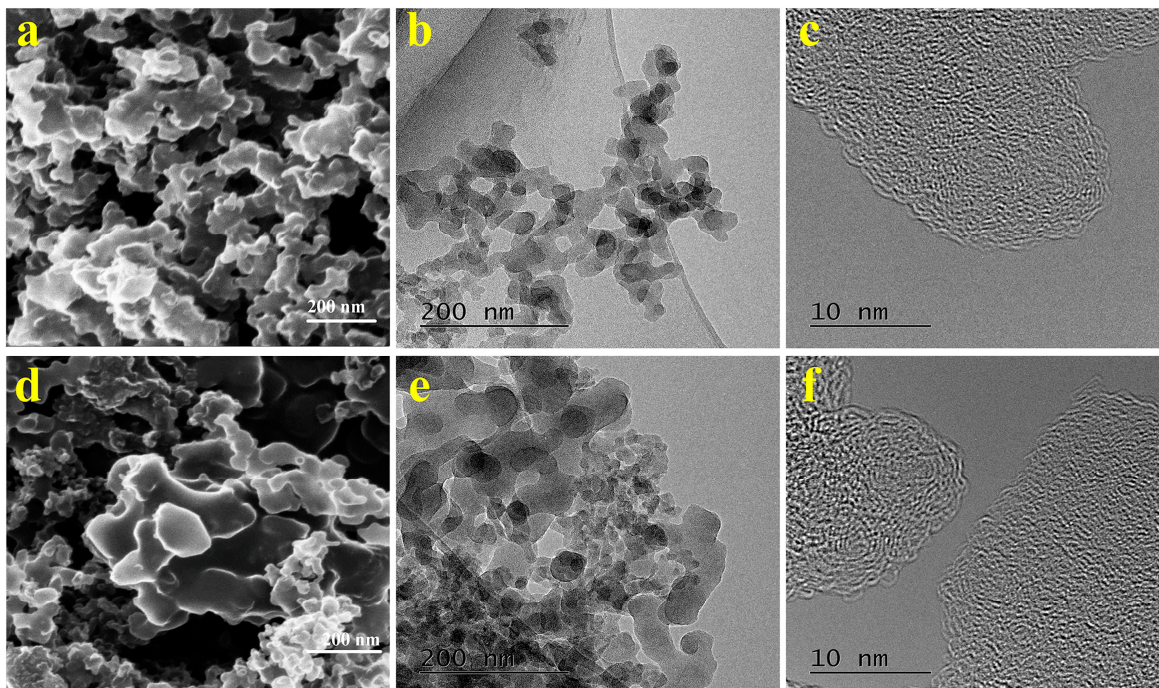

**Figure S2.** HIM images, typical TEM images and HRTEM images of  $F_{air1}$  and  $F_{ar1}$ . (a): HIM image of  $F_{air1}$ ; (b): typical TEM image of  $F_{air1}$ ; (c): HRTEM image of  $F_{air1}$ ; (d): HIM image of  $F_{ar1}$ ; (e): typical TEM image of  $F_{ar1}$ ; (f): HRTEM image of  $F_{ar1}$ .

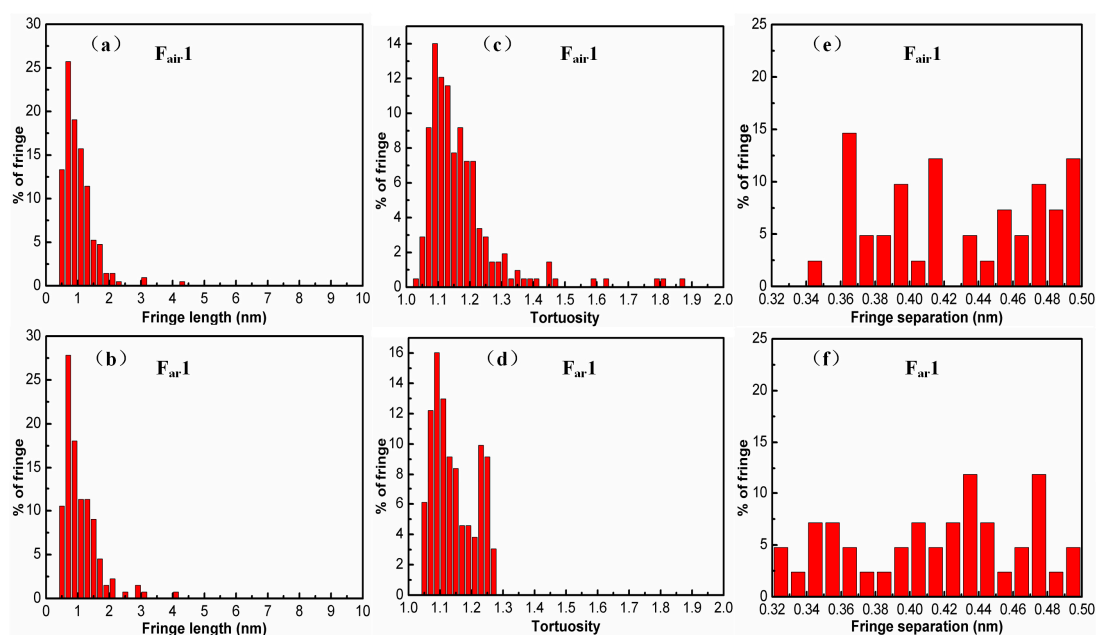

**Figure S3.** Histograms of fringe length, tortuosity and separation for  $F_{air1}$  and  $F_{ar1}$ : (a) Histograms of fringe length for  $F_{air1}$ ; (b) Histograms of tortuosity for  $F_{air1}$ ; (c) Histograms of separation for  $F_{air1}$ ; (d) Histograms of fringe length for  $F_{ar1}$ ; (e) Histograms of tortuosity for  $F_{ar1}$ ; (f) Histograms of separation for  $F_{ar1}$ .

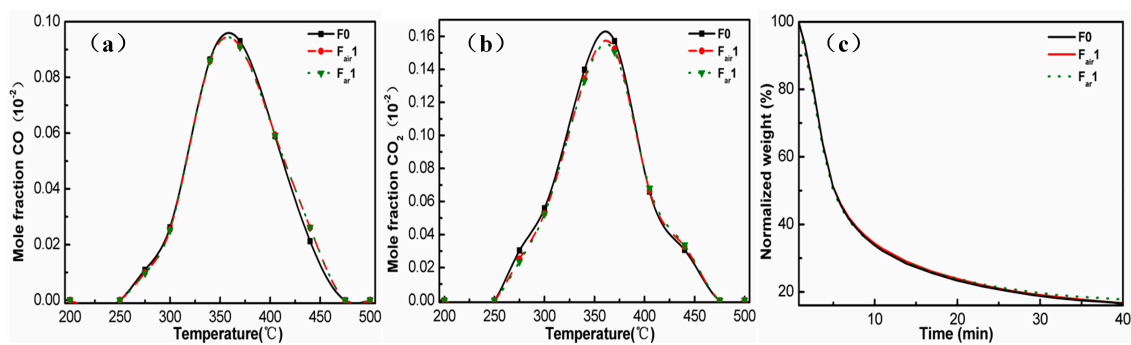

**Figure S4.** Oxidative behaviors for the three samples. (a): CO mole fraction of three samples in TPO experiments; (b): CO<sub>2</sub> mole fraction of three samples in TPO experiments; (c): TGA results of isothermal oxidation for three samples at 500 °C.

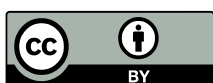

© 2017 by the authors. Submitted for possible open access publication under the terms and conditions of the Creative Commons Attribution (CC-BY) license (<http://creativecommons.org/licenses/by/4.0/>).
